# Supplementary material for: Improved Machine Learning-Based Model for the Classification of Off-Targets in the CRISPR/Cpf1 System
Source: PubMed Central journal article supplement — ACS Omega. 2023 Nov 17;8(48):45578–88. doi: 10.1021/acsomega.3c05691 (PMC10701861; doi:10.1021/acsomega.3c05691), 2023-11-17
Supplement: ao3c05691_si_001.pdf [file ao3c05691_si_001.pdf]

# **An improved machine learning-based model for the classification of off-targets in the CRISPR/Cpf1 system**

Pragya Kesarwani<sup>1,2</sup>, Dhvani Sandip Vora<sup>2</sup> and Durai Sundar<sup>2,3, \*</sup>

<sup>1</sup>Regional Centre for Biotechnology, NCR Biotech Science Cluster, 3<sup>rd</sup> Milestone, Faridabad-Gurgaon Expressway, Faridabad 121001, Haryana, India

<sup>2</sup>Department of Biochemical Engineering and Biotechnology, Indian Institute of Technology (IIT) Delhi, New Delhi 110016, India

<sup>3</sup>Yardi School of Artificial Intelligence, Indian Institute of Technology (IIT) Delhi, New Delhi 110016, India

\*Correspondence: DS: [sundar@dbeb.iitd.ac.in](mailto:sundar@dbeb.iitd.ac.in)

PK: [pragya.kesarwani@rcb.res.in](mailto:pragya.kesarwani@rcb.res.in)

DSV: [dhvani.vora@dbeb.iitd.ac.in](mailto:dhvani.vora@dbeb.iitd.ac.in)

DS: [sundar@dbeb.iitd.ac.in](mailto:sundar@dbeb.iitd.ac.in)

## List of Supplementary Data

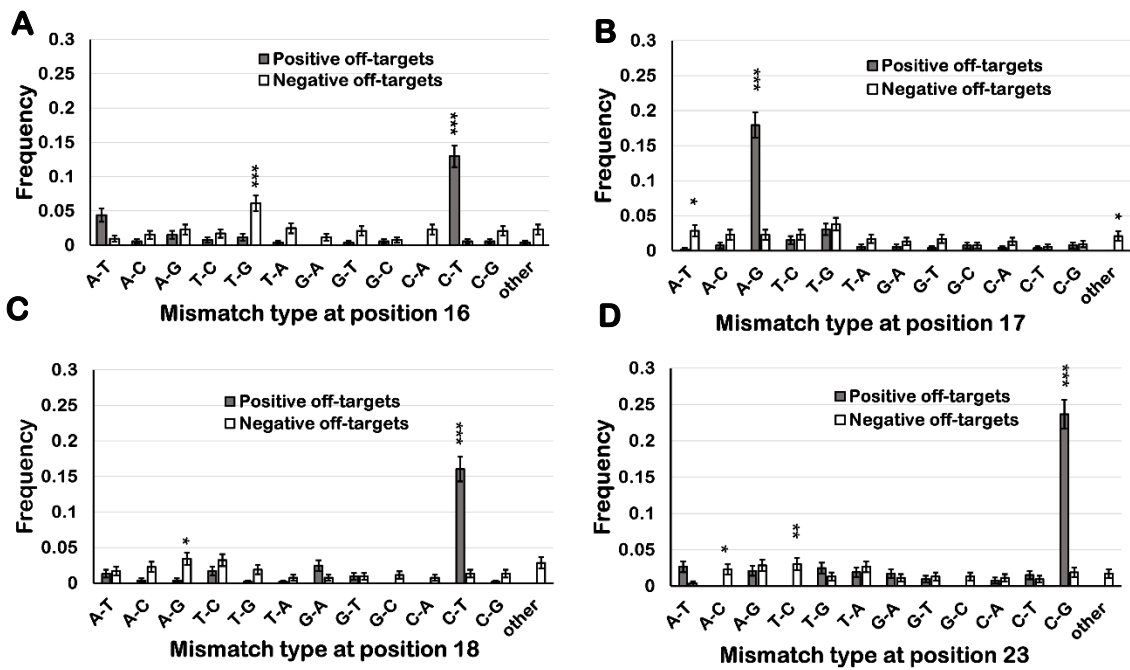

**Supplementary Figure 1: Presence of one-base mismatch type in positive and negative off-targets of AsCpf1 at position (A) 16, (B) 17, (C) 18 and (D) 23 from PAM.; \* denotes the P-value  $\geq 0.0005$  whereas \*\*\* denotes the P-value  $< 0.0005$ ; error bars, s.e.m.**

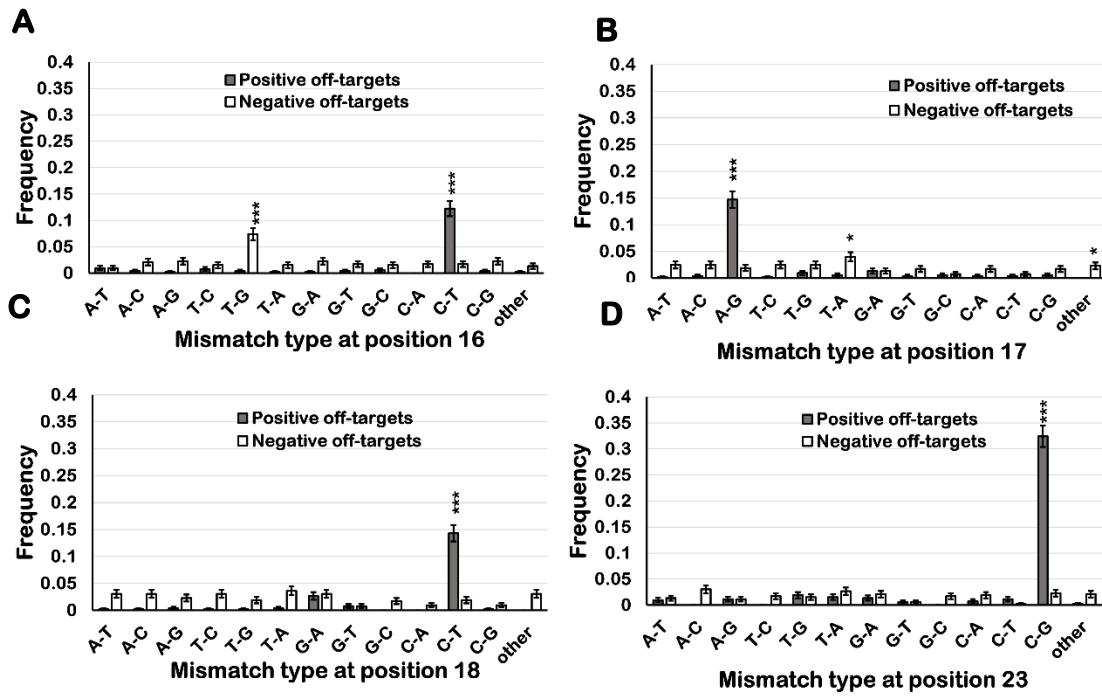

**Supplementary Figure 2: Presence of one-base mismatch type in positive and negative off-targets of LbCpf1 at position (A) 16, (B) 17, (C) 18 and (D) 23 from PAM.; \* denotes the P-value  $\geq 0.0005$  whereas \*\*\* denotes the P-value  $< 0.0005$ ; error bars, s.e.m.**

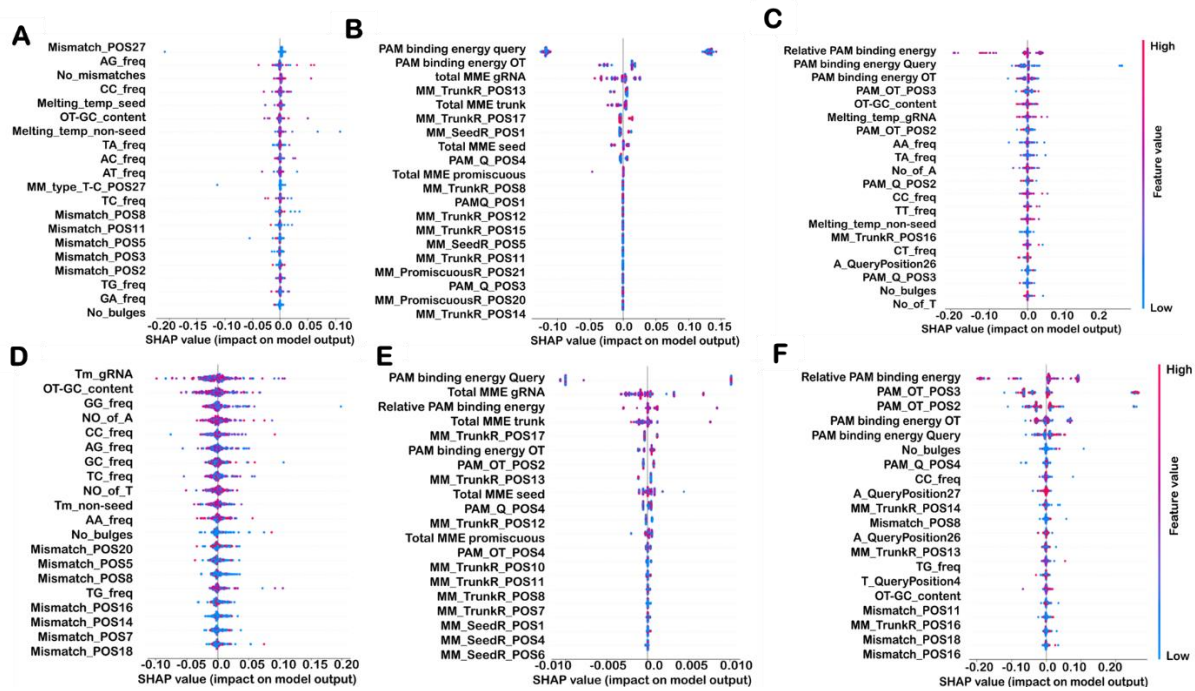

**Supplementary Figure 3: Summary plot depicting top 20 features of best models on hybrid feature sets.** Top 20 features based on mean SHAP values of models trained on AsCpf1 dataset using (A) sequence-based feature set (B) base-dependent binding energy associated feature set and (C) sequence and base-dependent binding energy associated feature set. Similarly, the Summary plot is based on mean SHAP values for the LbCpf1 dataset using (D) sequence-based feature set (E) base-dependent binding energy associated feature set, and (F) sequence and base-dependent binding energy associated feature set. The data points lying in the left quadrant represents the negative off-targets and data points lying in the right quadrant represents positive off-targets. The color of the data points represents the feature value. Blue color represents the minimum value of the feature and magenta indicates the maximum feature value.

**Supplementary Table 1: Hyperparameters tuned recursively to optimize machine learning models for both AsCpf1 and LbCpf1**

| <b>ML model</b>        | <b>Hyperparameters</b>                                                                                                                                                                                                                                                                                                                                |
|------------------------|-------------------------------------------------------------------------------------------------------------------------------------------------------------------------------------------------------------------------------------------------------------------------------------------------------------------------------------------------------|
| MLPClassifier          | Seed, weight optimization, alpha, activation function, number of hidden layers, size of hidden layers, maximum number of iterations, validation set, initial learning rate, learning rate schedule, random state, tolerance for optimization, maximum number of epochs without any improvement in tolerance, validation set, epsilon, beta1 and beta2 |
| AdaBoostClassifier     | Base estimator, number of estimators, learning rate, random state, seed value                                                                                                                                                                                                                                                                         |
| LinearSVC              | Regularization parameter (C), class weights, loss function, penalty, dual, tolerance, seed value                                                                                                                                                                                                                                                      |
| LogisticRegression     | Class weights, inverse of regularization strength (C), maximum number of iterations, algorithms, seed value                                                                                                                                                                                                                                           |
| DecisionTreeClassifier | Class weights, number of features, maximum depth of the tree, minimal cost_complexity pruning (ccp_alpha), number of leaf nodes, random state, Seed value                                                                                                                                                                                             |

**\* The optimized values for the above mentioned parameters have been provided in the associated Jupyter Notebook.**

**Supplementary Table 2: Comparison of prediction errors of best performing models of three different feature sets with and without undersampling.**

| Species | Model          | Without under sampling |          |       | With under sampling |          |       |
|---------|----------------|------------------------|----------|-------|---------------------|----------|-------|
|         |                | Bias                   | Variance | MSE   | Bias                | Variance | MSE   |
| AsCpf1  | SeqClassifier  | 0.003                  | 0.001    | 0.004 | 0.008               | 0.015    | 0.023 |
|         | MMEClassifier  | 0.003                  | 0.000    | 0.003 | 0.032               | 0.023    | 0.054 |
|         | CombClassifier | 0.003                  | 0.001    | 0.003 | 0.015               | 0.017    | 0.032 |
| LbCpf1  | SeqClassifier  | 0.002                  | 0.001    | 0.002 | 0.039               | 0.036    | 0.075 |
|         | MMEClassifier  | 0.002                  | 0.001    | 0.002 | 0.063               | 0.029    | 0.92  |
|         | CombClassifier | 0.004                  | 0.007    | 0.010 | 0.032               | 0.043    | 0.074 |

**Supplementary Table 3: Performances of optimized machine learning models on 25% test split of AsCpf1 dataset with hybrid feature set**

| Feature sets                                        | Models                    | Precision   | Recall      | F1 score    | MCC          |
|-----------------------------------------------------|---------------------------|-------------|-------------|-------------|--------------|
| Sequence associated feature set                     | <b>AdaBoostClassifier</b> | <b>0.92</b> | <b>0.90</b> | <b>0.91</b> | <b>0.815</b> |
|                                                     | LinearSVC                 | 0.85        | 0.91        | 0.87        | 0.749        |
|                                                     | LogisticRegression        | 0.83        | 0.93        | 0.87        | 0.746        |
|                                                     | DecisionTreeClassifier    | 0.81        | 0.92        | 0.86        | 0.722        |
|                                                     | MLPClassifier             | 0.87        | 0.89        | 0.88        | 0.766        |
| Mismatch energy associated feature set              | <b>AdaBoostClassifier</b> | <b>0.95</b> | <b>0.89</b> | <b>0.92</b> | <b>0.844</b> |
|                                                     | LinearSVC                 | 0.88        | 0.83        | 0.86        | 0.715        |
|                                                     | LogisticRegression        | 0.91        | 0.88        | 0.89        | 0.789        |
|                                                     | DecisionTreeClassifier    | 0.97        | 0.87        | 0.92        | 0.837        |
|                                                     | MLPClassifier             | 0.97        | 0.86        | 0.91        | 0.827        |
| Sequence and mismatch energy associated feature set | AdaBoostClassifier        | 0.94        | 0.86        | 0.89        | 0.790        |
|                                                     | LinearSVC                 | 0.95        | 0.86        | 0.90        | 0.806        |
|                                                     | LogisticRegression        | 0.91        | 0.86        | 0.88        | 0.770        |
|                                                     | DecisionTreeClassifier    | 0.67        | 0.84        | 0.72        | 0.477        |
|                                                     | <b>MLPClassifier</b>      | <b>0.92</b> | <b>0.91</b> | <b>0.92</b> | <b>0.832</b> |

**Supplementary Table 4: Performances of optimized machine learning models on 25% test split of LbCpf1 dataset with hybrid feature set**

| Feature sets                                        | Models                    | Precision   | Recall      | F1 score    | MCC          |
|-----------------------------------------------------|---------------------------|-------------|-------------|-------------|--------------|
| Sequence associated feature set                     | AdaBoostClassifier        | 0.95        | 0.85        | 0.89        | 0.791        |
|                                                     | LinearSVC                 | 0.87        | 0.93        | 0.89        | 0.789        |
|                                                     | LogisticRegression        | 0.88        | 0.93        | 0.90        | 0.800        |
|                                                     | DecisionTreeClassifier    | 0.86        | 0.90        | 0.88        | 0.756        |
|                                                     | <b>MLPClassifier</b>      | <b>0.92</b> | <b>0.90</b> | <b>0.91</b> | <b>0.824</b> |
| Mismatch energy associated feature set              | <b>AdaBoostClassifier</b> | <b>0.94</b> | <b>0.90</b> | <b>0.92</b> | <b>0.834</b> |
|                                                     | SVC                       | 0.97        | 0.86        | 0.91        | 0.818        |
|                                                     | LogisticRegression        | 0.93        | 0.87        | 0.89        | 0.791        |
|                                                     | DecisionTreeClassifier    | 0.81        | 0.90        | 0.85        | 0.714        |
|                                                     | MLPClassifier             | 0.96        | 0.86        | 0.91        | 0.815        |
| Sequence and mismatch energy associated feature set | AdaBoostClassifier        | 0.96        | 0.84        | 0.89        | 0.784        |
|                                                     | LinearSVC                 | 0.88        | 0.91        | 0.89        | 0.789        |
|                                                     | LogisticRegression        | 0.90        | 0.92        | 0.91        | 0.818        |
|                                                     | DecisionTreeClassifier    | 0.86        | 0.85        | 0.86        | 0.713        |
|                                                     | <b>MLPClassifier</b>      | <b>0.91</b> | <b>0.92</b> | <b>0.91</b> | <b>0.821</b> |



**Supplementary Table 5: Comparison of performance metrics of best performing model with the existing models**

| <b>Dataset</b> | <b>Models</b>  | <b>Precision</b> | <b>Recall</b> | <b>F1 score</b> | <b>auc_roc</b> | <b>MCC</b> |
|----------------|----------------|------------------|---------------|-----------------|----------------|------------|
| AsCpf1         | CombClassifier | 0.92             | 0.91          | 0.92            | 0.915          | 0.832      |
|                | SeqClassifier  | 0.92             | 0.90          | 0.91            | 0.899          | 0.815      |
|                | MMEClassifier  | 0.95             | 0.89          | 0.92            | 0.892          | 0.820      |
|                | CRISPR-DT      | 0.50             | 0.45          | 0.37            | 0.483          | 0.016      |
|                | CINDEL         | 0.50             | 0.48          | 0.49            | 0.476          | 0.017      |
|                | DeepCpf1       | 0.68             | 0.57          | 0.62            | 0.546          | 0.116      |
| LbCpf1         | CombClassifier | 0.91             | 0.92          | 0.91            | 0.915          | 0.821      |
|                | SeqClassifier  | 0.92             | 0.90          | 0.91            | 0.903          | 0.824      |
|                | MMEClassifier  | 0.94             | 0.90          | 0.92            | 0.899          | 0.833      |
|                | CRISPR-DT      | 0.50             | 0.48          | 0.49            | 0.483          | 0.017      |
|                | CINDEL         | 0.49             | 0.35          | 0.40            | 0.348          | 0.076      |
|                | DeepCpf1       | 0.63             | 0.54          | 0.58            | 0.537          | 0.120      |

**Supplementary Table 6: Highly significant position-specific mononucleotides with enrichment score and P-values calculated using a Welch *t*-test.**

| Position | Nucleotide | P-value (LbCpf1) | enrichment ratio (LbCpf1) | P-value (AsCpf1) | Enrichment ratio (AsCpf1) |
|----------|------------|------------------|---------------------------|------------------|---------------------------|
| 1        | C          | 2.67E-15         | 0.163355                  | 5.86E-24         | 0.048169                  |
|          | G          | 6.69E-17         | 3.193583                  | 6.07E-07         | 2.178062                  |
|          | T          | 0.003058         | 1.155534                  | 5.71E-14         | 1.38697                   |
|          | A          | 5.01E-16         | 0.117872                  | 9.63E-16         | 0.068624                  |
| 2        | C          | 5.75E-24         | 0.07221                   | 1.80E-28         | 0.041746                  |
|          | G          | 3.93E-11         | 0                         | 1.91E-12         | 0.020038                  |
|          | T          | 8.52E-63         | 1.752491                  | 1.72E-66         | 1.837477                  |
|          | A          | 8.08E-20         | 0                         | 4.34E-16         | 0                         |
| 3        | C          | 1.54E-07         | 0.216098                  | 1.99E-12         | 0.05465                   |
|          | G          | 1.61E-17         | 0.02745                   | 6.26E-16         | 0.015655                  |
|          | T          | 4.09E-65         | 1.824905                  | 8.07E-51         | 1.577262                  |
|          | A          | 4.88E-31         | 0.00828                   | 7.31E-18         | 0                         |
| 4        | C          | 0.00053          | 1.559933                  | 4.63E-07         | 1.900679                  |
|          | G          | 1.22E-07         | 1.535392                  | 9.84E-05         | 1.39396                   |
|          | T          | 1.52E-18         | 0.341432                  | 1.27E-21         | 0.304929                  |
|          | A          | 0.603652         | 0.938725                  | 0.63144          | 1.041985                  |
| 5        | C          | 0.007723         | 1.355523                  | 1.49E-07         | 1.75334                   |
|          | G          | 9.00E-30         | 2.298496                  | 7.16E-15         | 1.846801                  |
|          | T          | 5.08E-16         | 0.338224                  | 3.14E-13         | 0.378204                  |
|          | A          | 4.74E-19         | 0.178306                  | 6.32E-20         | 0.14313                   |
| 6        | C          | 0.000893         | 0.590013                  | 0.522355         | 0.882278                  |
|          | G          | 1.67E-08         | 1.520338                  | 0.000748         | 1.340789                  |
|          | T          | 0.222999         | 1.118259                  | 0.000136         | 1.335878                  |
|          | A          | 1.76E-09         | 0.359909                  | 6.81E-18         | 0.202066                  |
| 7        | C          | 0.541413         | 0.925573                  | 0.939707         | 0.972149                  |
|          | G          | 3.53E-53         | 3.59111                   | 1.38E-33         | 2.435533                  |
|          | T          | 3.86E-25         | 0.333969                  | 2.84E-19         | 0.354843                  |
|          | A          | 5.41E-10         | 0.337276                  | 4.71E-10         | 0.222646                  |
| 8        | C          | 4.56E-15         | 0.363192                  | 8.99E-11         | 0.400763                  |
|          | G          | 1.88E-10         | 0.150286                  | 0.008993         | 0.550067                  |
|          | T          | 9.62E-14         | 1.830825                  | 4.71E-09         | 1.651583                  |
|          | A          | 0.004876         | 1.271171                  | 0.115496         | 1.121183                  |
| 9        | C          | 0.00046          | 0.660679                  | 1.52E-05         | 0.577743                  |
|          | G          | 1.58E-20         | 2.416975                  | 1.92E-15         | 2.162013                  |
|          | T          | 0.611726         | 0.955308                  | 0.297628         | 1.077524                  |
|          | A          | 5.47E-12         | 0.313096                  | 7.75E-12         | 0.255806                  |
| 10       | C          | 0.003389         | 0.692376                  | 0.684719         | 0.931066                  |
|          | G          | 8.73E-08         | 1.748428                  | 2.07E-09         | 1.830016                  |
|          | T          | 1.16E-25         | 0.157835                  | 1.74E-25         | 0.158923                  |
|          | A          | 1.92E-08         | 1.579167                  | 0.00334          | 1.274537                  |
| 11       | C          | 0.000532         | 0.592966                  | 0.012353         | 0.624378                  |
|          | G          | 6.43E-05         | 1.558524                  | 1.11E-05         | 1.603053                  |

|    |   |          |          |          |          |
|----|---|----------|----------|----------|----------|
|    | T | 0.002283 | 1.259083 | 0.170254 | 0.881487 |
|    | A | 3.03E-06 | 0.559036 | 0.368631 | 0.882022 |
| 12 | C | 4.80E-21 | 2.755248 | 3.43E-11 | 2.168514 |
|    | G | 0.003885 | 0.667939 | 2.96E-05 | 0.520599 |
|    | T | 0.910877 | 0.989837 | 0.017804 | 1.196218 |
|    | A | 3.90E-11 | 0.471829 | 2.91E-08 | 0.497546 |
| 13 | C | 0.112851 | 1.166508 | 0.00331  | 1.276404 |
|    | G | 0.000221 | 0.619065 | 2.80E-06 | 0.500954 |
|    | T | 1.24E-10 | 0.459996 | 4.25E-10 | 0.446797 |
|    | A | 8.95E-15 | 2.145501 | 1.65E-12 | 2.18137  |
| 14 | C | 0.929228 | 1.009442 | 0.01234  | 1.278297 |
|    | G | 1.86E-09 | 1.7291   | 0.004636 | 1.31083  |
|    | T | 0.000226 | 0.651591 | 0.050202 | 0.779262 |
|    | A | 0.003157 | 0.687259 | 0.000842 | 0.640564 |
| 15 | C | 1.93E-10 | 0.405352 | 1.21E-07 | 0.472901 |
|    | G | 7.48E-14 | 0.410138 | 3.22E-16 | 0.318487 |
|    | T | 1.24E-05 | 0.466004 | 0.065348 | 0.751431 |
|    | A | 1.72E-49 | 2.699171 | 1.68E-37 | 2.567916 |
| 16 | C | 5.64E-36 | 3.143919 | 9.54E-25 | 2.641395 |
|    | G | 2.74E-07 | 0.430821 | 0.013905 | 0.635012 |
|    | T | 0.004482 | 0.746764 | 0.014993 | 0.775286 |
|    | A | 4.26E-10 | 0.500954 | 7.16E-11 | 0.450859 |
| 17 | C | 2.44E-19 | 2.428539 | 1.85E-14 | 2.295512 |
|    | G | 0.475457 | 1.113232 | 0.714755 | 0.932008 |
|    | T | 2.25E-16 | 0.288319 | 4.49E-06 | 0.509743 |
|    | A | 0.023411 | 0.835693 | 0.009386 | 0.791752 |
| 18 | C | 7.03E-43 | 3.245312 | 2.15E-31 | 2.790261 |
|    | G | 0.006899 | 0.7121   | 0.004309 | 0.661638 |
|    | T | 1.17E-11 | 0.442561 | 4.63E-05 | 0.627001 |
|    | A | 1.50E-08 | 0.48319  | 2.45E-09 | 0.42717  |
| 19 | C | 0.015501 | 1.354853 | 0.002588 | 1.409278 |
|    | G | 9.31E-08 | 0.51487  | 2.69E-10 | 0.411231 |
|    | T | 9.22E-07 | 0.512977 | 0.000341 | 0.589909 |
|    | A | 2.36E-11 | 1.651293 | 9.71E-09 | 1.549003 |
| 20 | C | 1.13E-07 | 0.304929 | 2.87E-05 | 0.369124 |
|    | G | 6.86E-06 | 0.612277 | 5.36E-06 | 0.581107 |
|    | T | 0.418795 | 0.922287 | 0.441785 | 1.05464  |
|    | A | 2.33E-16 | 1.923955 | 2.12E-09 | 1.667238 |
| 21 | C | 1.33E-23 | 2.460998 | 6.91E-13 | 1.965282 |
|    | G | 0.114503 | 1.18258  | 0.010224 | 1.313181 |
|    | T | 2.04E-05 | 0.477654 | 0.150574 | 0.780708 |
|    | A | 2.00E-17 | 0.414251 | 3.44E-17 | 0.403754 |
| 22 | C | 1.40E-14 | 0.36198  | 1.09E-08 | 0.468518 |
|    | G | 1.78E-05 | 0.471486 | 0.010011 | 0.59129  |
|    | T | 4.49E-06 | 1.616286 | 3.08E-06 | 1.54075  |
|    | A | 9.92E-08 | 1.488384 | 0.021302 | 1.189012 |
| 23 | C | 1.14E-05 | 1.51069  | 0.015363 | 1.265122 |
|    | G | 0.006918 | 0.664309 | 0.011354 | 0.667939 |

|    |   |          |          |          |          |
|----|---|----------|----------|----------|----------|
|    | T | 0.027167 | 1.282817 | 0.15793  | 1.134974 |
|    | A | 2.77E-05 | 0.678215 | 0.152308 | 0.848282 |
| 24 | C | 1.06E-11 | 1.81448  | 0.000106 | 1.416761 |
|    | G | 0.112259 | 1.295571 | 0.101062 | 1.288168 |
|    | T | 0.000417 | 0.601145 | 0.001285 | 0.635138 |
|    | A | 4.40E-07 | 0.663657 | 0.07593  | 0.841174 |
| 25 | C | 0.628107 | 0.948777 | 0.161395 | 1.189766 |
|    | G | 0.000619 | 0.646393 | 0.839927 | 0.945197 |
|    | T | 2.20E-06 | 0.593723 | 0.42042  | 0.873757 |
|    | A | 0.865976 | 1.007944 | 0.722505 | 0.96139  |
| 26 | C | 0.867066 | 1.020292 | 1.94E-05 | 2.027117 |
|    | G | 1.66E-10 | 1.518043 | 3.78E-11 | 1.767594 |
|    | T | 0.01275  | 0.751431 | 0.954895 | 0.989539 |
|    | A | 5.08E-33 | 0.398153 | 4.73E-23 | 0.3983   |
| 27 | C | 0.063181 | 1.217194 | 8.95E-07 | 1.9243   |
|    | G | 3.46E-16 | 1.76218  | 9.86E-18 | 2.241383 |
|    | T | 4.77E-06 | 0.577489 | 0.887903 | 0.960162 |
|    | A | 1.04E-42 | 0.33715  | 2.41E-37 | 0.28626  |

**Supplementary Table 7: Complete set of features used for training model for the prediction of on-target efficiencies.**

|                                                                                            |                                              |                                              |                                                                          |
|--------------------------------------------------------------------------------------------|----------------------------------------------|----------------------------------------------|--------------------------------------------------------------------------|
| Feature set 3                                                                              | Feature set 1                                | Position-Specific nucleotide composition     | Position-specific mononucleotides in target (27*4=108)                   |
|                                                                                            |                                              |                                              | Position-specific mononucleotides in off-target (27*4=108)               |
|                                                                                            |                                              | Position non-specific nucleotide composition | Mononucleotides counts (4)                                               |
|                                                                                            |                                              |                                              | Dinucleotides frequencies (16)                                           |
|                                                                                            |                                              |                                              | GC content (1)                                                           |
|                                                                                            |                                              | Repetitive sequences                         | Presence of AAAA (1), TTTT (1), GGGG (1), CCCC(1)                        |
|                                                                                            |                                              | Mismatches                                   | Number of mismatches (1)                                                 |
|                                                                                            |                                              |                                              | Position-specific mismatches (27)                                        |
|                                                                                            | Position-specific mismatch types (16*27=432) |                                              |                                                                          |
|                                                                                            | Bulges                                       | Number of bulges (1)                         |                                                                          |
|                                                                                            |                                              | Position-specific bulges (27)                |                                                                          |
|                                                                                            | Feature set 2                                | Thermodynamics Related features              | Minimum free energy (1)                                                  |
|                                                                                            |                                              |                                              | Melting temperature (Seed region (1) , non-seed region (1) and gRNA (1)) |
|                                                                                            |                                              |                                              | Base-dependent binding energy of PAM region (8) [1]                      |
|                                                                                            |                                              |                                              | PAM binding energy of target (1) and off-target (1)                      |
|                                                                                            |                                              |                                              | Relative PAM binding energy (1)                                          |
| Position-specific mismatch-dependent binding energy weights to protospacer region (23) [1] |                                              |                                              |                                                                          |
| Total base-dependent binding energy of seed region, non-seed region and gRNA (3) [1]       |                                              |                                              |                                                                          |

## Reference

1. Specht, D. A.; Xu, Y.; Lambert, G., Massively parallel CRISPRi assays reveal concealed thermodynamic determinants of dCas12a binding. *Proceedings of the National Academy of Sciences* **2020**, *117* (21), 11274-11282.
